# Supplementary material
Source: PubMed Central journal article supplement (PMC3911745)

**Supplemental Figure 1. Anti-HIV-1 activity of ribonucleoside analogs associated with the late phase of viral replication.** A. Assay for late phase anti-HIV-1 activity of ribonucleoside analogs. The pNL4-3 MIG and pHCMV\_VSVG plasmids are cotransfected into 293T cells in the presence or absence of ribonucleoside analog, and vector virus is harvested, filtered and used to infect target cells. Flow cytometry is done to analyze virus infectivity and mutant frequency. B. Analysis of HIV-1 infectivity and cell cytotoxicity in 293T cells of ribonucleoside analogs during virus production. The antiviral dose response of i) 8-azaadenosine, ii) formycin A, iii) 3-deazauridine, iv) 5-fluorocytidine, and v) 2'-C-methylcytidine is shown (along with EC50 value) along with corresponding analysis of cell cytotoxicity.

# Dapp et al. Supplemental Figure 1

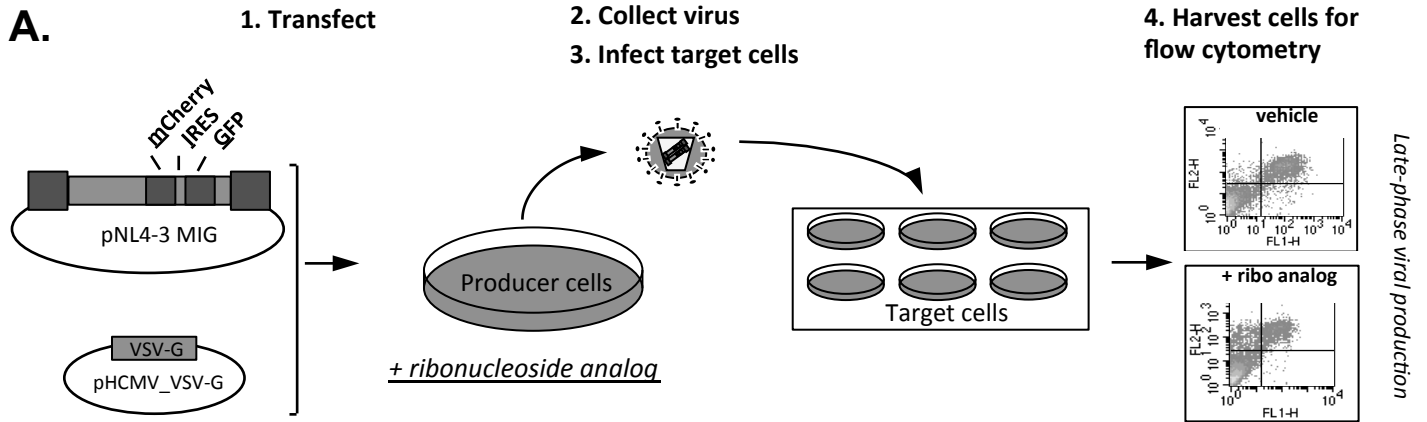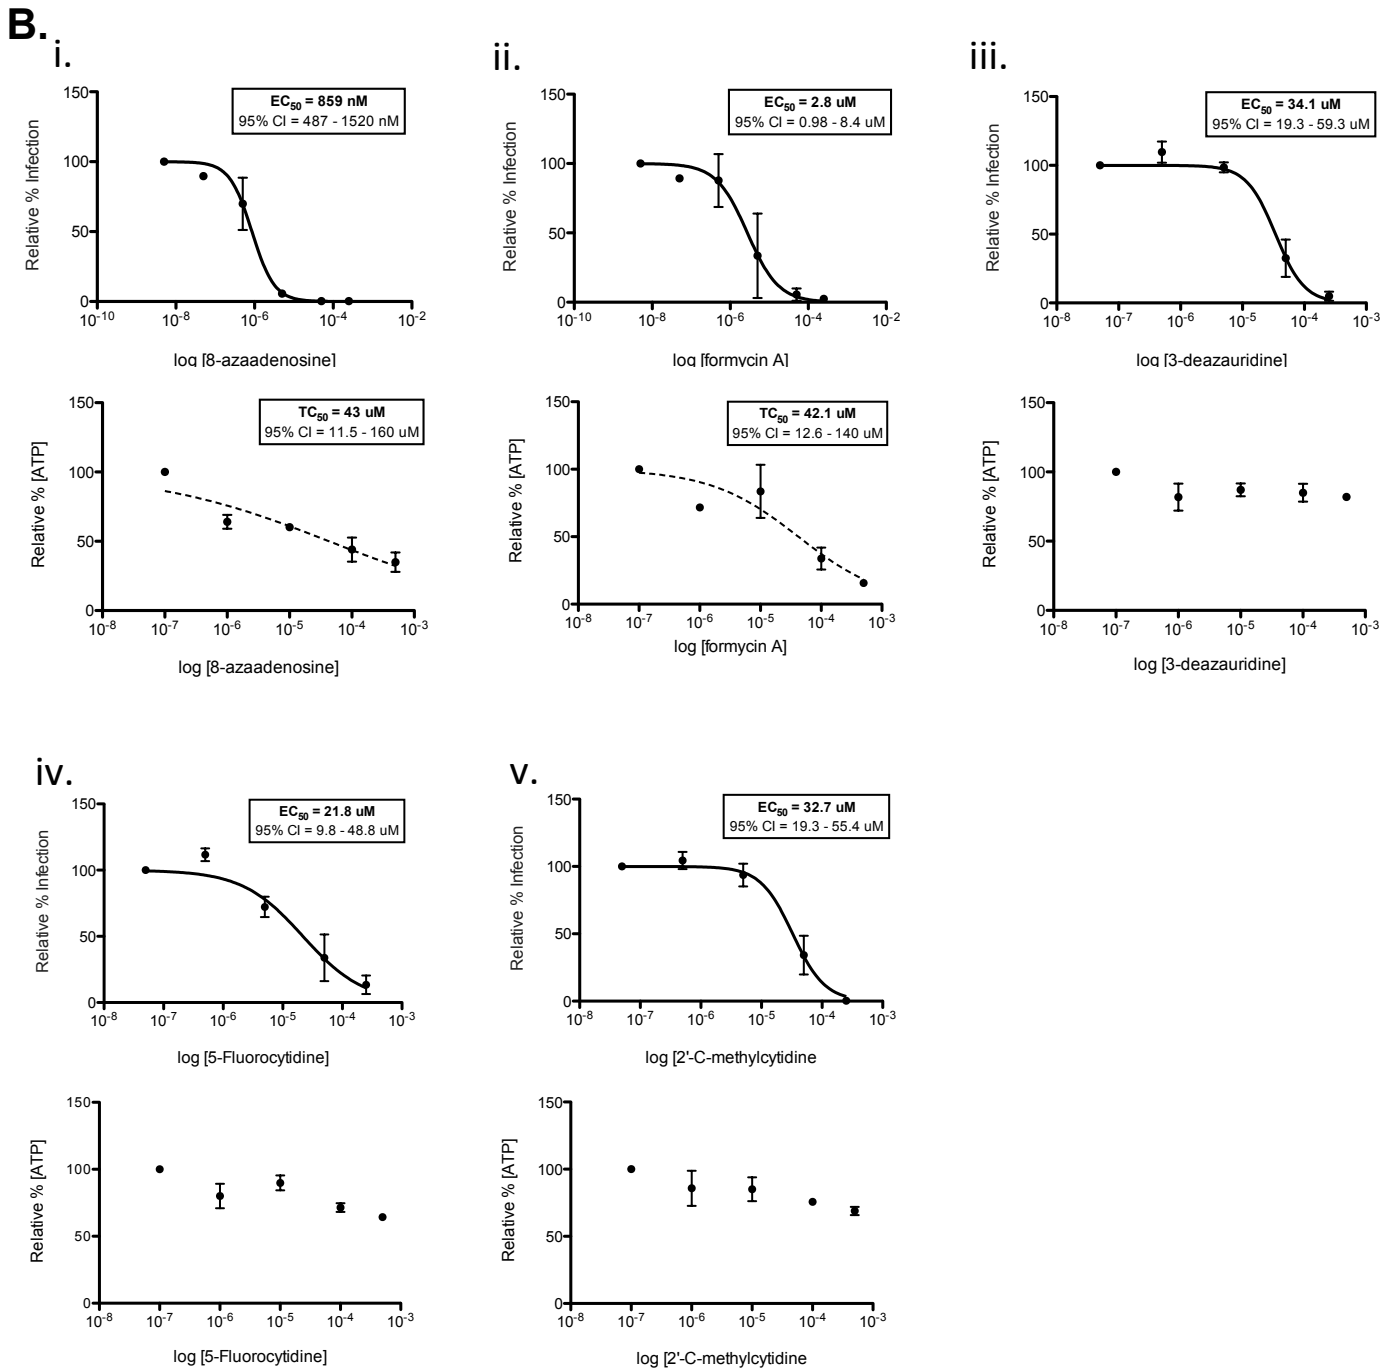

Supplement: JVI.02444-13_zjv999098480so1.pdf [file JVI.02444-13_zjv999098480so1.pdf]
